# Supplementary material for: Optimal Enteral Nutrition Support Preserved Muscle Mass in Critically Ill Children
Source: Hindawi journal article supplement (doi:10.1155/2022/7004543), 2022-01-25
Supplement: f1 [file 7004543.f1.pdf]

293 Supplement 1 The Enteral Nutrition Support Guideline

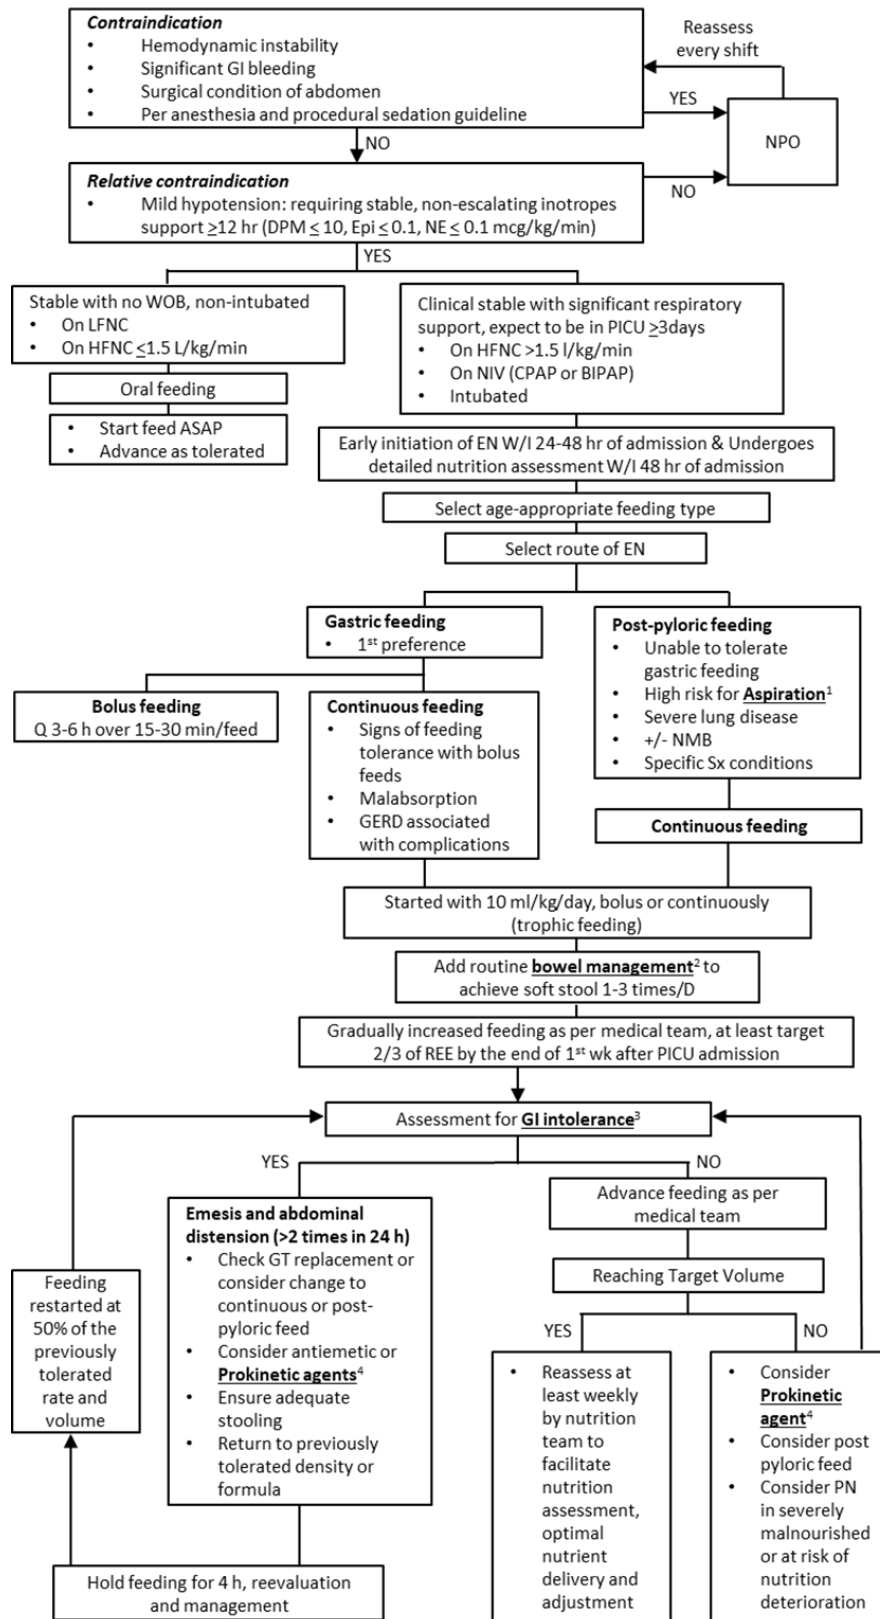

**1. Risk of aspiration**  
 - Known case of GERD  
 - Severe WOB  
 - Abdominal distension

**2. Bowel management**  
**Infants, children**  
 - Lactulose (3.3g/5ml): 1-2 g/kg, OD bid  
 - PEG 4000 (10g/sachet): 1-1.5 g/kg/D, PO OD, max 100g/day with maximum of 6 consecutive days  
**Children > 2 y**  
 - Senokot: 1-2 tab/D, PO q 12-24 h  
 - Magnesium hydroxide (400 mg/5ml)  
 • 2-5 y: 5-15 ml/D, PO q 12-24 h  
 • 6-11 y: 15-30 ml/D, PO q 12-24 h  
 • >12 y: 30-60 ml/D, PO q 12-24 h  
 - Unison enema (133 ml/dose):  
 • 1-18 y: 2.5 ml/kg (max 133 ml/dose)

**3. GI intolerance**  
 - Abdominal distension or emesis > 2 consecutive times  
 - Residual gastric content >50% of previous feeding volume in bolus feeding or total 2 hourly infusion rate in continuous feeding

**4. Prokinetic agent**  
 - Domperidone: 1.2-2.4 mg/kg/D, PO q 6-8 h, ac and hs, max 10 md/dose (may prolong QTc interval: consider close clinical and ECG monitoring – baseline ECG and 48 h after starting)  
 - Erythromycin: 3-10 mg/kg/D, PO q 6 h (assess risk-benefit in full term infant < 14d of age due to association of infantile hypertrophic pyloric stenosis)  
 - Ondansetron: 0.1 mg/kg/d, IV or PO q 8 h prn, max 4-8 mg/dose

**Targeted Indirect calorimetry**  
 Who are at high risk for metabolic alteration  
 - Underweight, or obese  
 - Children w/ >10% Wt change during ICU stay  
 - Failure to consistently meet prescribed energy goals  
 - Failure to wean or need to escalate respiratory support  
 - Neurologic trauma  
 - Oncologic diagnosed  
 - Children w/ thermal injuries or amputations  
 - Children requiring MV > 3 days  
 - Children suspected to be severely hypermetabolic (SE, hyperthermia, SIRS, dysautonomic storms, eat) or hypometabolic (hypothermia, hypothyroidism, pentobarbital or midazolam coma, etc)

\*Suggest to start PN if not reaching target energy goal by EN after first week
